# Supplementary material for: Incidence of Interstitial Lung Disease in Patients With Rheumatoid Arthritis Treated With Biologic and Targeted Synthetic Disease-Modifying Antirheumatic Drugs
Source: PubMed Central journal article supplement (PMC10028485; doi:10.1001/jamanetworkopen.2023.3640), 2023-03-20
Supplement: jamanetwopen-e233640-s001.pdf [file jamanetwopen-e233640-s001.pdf]

## Supplemental Online Content

Baker MC, Liu Y, Lu R, Lin J, Melehani J, Robinson WH. Incidence of interstitial lung disease in patients with rheumatoid arthritis treated with biologic and targeted synthetic disease-modifying antirheumatic drugs. *JAMA Netw Open*. 2023;6(3):e233640. doi:10.1001/jamanetworkopen.2023.3640

**eTable 1.** Codes Used for Patient Inclusion and Exclusion

**eTable 2.** Codes Used in ILD Algorithms

**eTable 3.** Codes Used to Exclude Other Causes of ILD

**eFigure 1.** Prevalent New-User Study Design With Time-Based Exposure Sets Defined by a 30-Day Interval Surrounding the Timing of Tofacitinib Initiation

**eFigure 2.** Cohort Selection

**eFigure 3.** Kaplan–Meier Plot for the Risk of ILD During Treatment With Different b/tsDMARDs in Patients With RA

This supplemental material has been provided by the authors to give readers additional information about their work.

**eTable 1.** Codes Used for Patient Inclusion and Exclusion

| <b>ICD Codes for Rheumatoid Arthritis</b>                                                                                                                                                                                                                                                                                                                                                                                                                                                                                                                                                                                                                                                                                                                                                                                                                                                                                                                                                                                                                      |                                                                  |
|----------------------------------------------------------------------------------------------------------------------------------------------------------------------------------------------------------------------------------------------------------------------------------------------------------------------------------------------------------------------------------------------------------------------------------------------------------------------------------------------------------------------------------------------------------------------------------------------------------------------------------------------------------------------------------------------------------------------------------------------------------------------------------------------------------------------------------------------------------------------------------------------------------------------------------------------------------------------------------------------------------------------------------------------------------------|------------------------------------------------------------------|
| <b>ICD-9</b>                                                                                                                                                                                                                                                                                                                                                                                                                                                                                                                                                                                                                                                                                                                                                                                                                                                                                                                                                                                                                                                   | <b>Diagnosis</b>                                                 |
| 714.0                                                                                                                                                                                                                                                                                                                                                                                                                                                                                                                                                                                                                                                                                                                                                                                                                                                                                                                                                                                                                                                          | Rheumatoid arthritis                                             |
| 714.1                                                                                                                                                                                                                                                                                                                                                                                                                                                                                                                                                                                                                                                                                                                                                                                                                                                                                                                                                                                                                                                          | Felty's syndrome                                                 |
| 714.2                                                                                                                                                                                                                                                                                                                                                                                                                                                                                                                                                                                                                                                                                                                                                                                                                                                                                                                                                                                                                                                          | Other rheumatoid arthritis with visceral or systemic involvement |
| <b>ICD-10</b>                                                                                                                                                                                                                                                                                                                                                                                                                                                                                                                                                                                                                                                                                                                                                                                                                                                                                                                                                                                                                                                  | <b>Diagnosis</b>                                                 |
| M06.00, M06.011, M06.012, M06.019, M06.021, M06.022, M06.029, M06.031, M06.032, M06.039, M06.041, M06.042, M06.049, M06.051, M06.052, M06.059, M06.061, M06.062, M06.069, M06.071, M06.072, M06.079, M06.08, M06.09, M06.0A, M06.811, M06.812, M06.819, M06.821, M06.822, M06.829, M06.831, M06.832, M06.839, M06.841, M06.842, M06.849, M06.851, M06.852, M06.859, M06.861, M06.862, M06.869, M06.871, M06.872, M06.879, M06.88, M06.8, M06.8A, M06.9, M05.60, M05.631, M05.632, M05.639, M05.641, M05.642, M05.649, M05.651, M05.652, M05.659, M05.661, M05.662, M05.669, M05.671, M05.672, M05.679, M05.69, M05.70, M05.711, M05.712, M05.719, M05.721, M05.722, M05.729, M05.731, M05.732, M05.739, M05.741, M05.742, M05.749, M05.751, M05.752, M05.759, M05.761, M05.762, M05.769, M05.771, M05.772, M05.779, M05.79, M05.7A, M05.80, M05.811, M05.812, M05.819, M05.821, M05.822, M05.829, M05.831, M05.832, M05.839, M05.841, M05.842, M05.849, M05.851, M05.852, M05.859, M05.861, M05.862, M05.869, M05.871, M05.872, M05.879, M05.89, M05.8A, M05.9 | Rheumatoid arthritis                                             |
| <b>ICD Codes for Interstitial Lung Disease</b>                                                                                                                                                                                                                                                                                                                                                                                                                                                                                                                                                                                                                                                                                                                                                                                                                                                                                                                                                                                                                 |                                                                  |
| <b>ICD-9</b>                                                                                                                                                                                                                                                                                                                                                                                                                                                                                                                                                                                                                                                                                                                                                                                                                                                                                                                                                                                                                                                   | <b>Diagnosis</b>                                                 |
| 515.xx                                                                                                                                                                                                                                                                                                                                                                                                                                                                                                                                                                                                                                                                                                                                                                                                                                                                                                                                                                                                                                                         | Post-inflammatory pulmonary fibrosis                             |
| 516.30                                                                                                                                                                                                                                                                                                                                                                                                                                                                                                                                                                                                                                                                                                                                                                                                                                                                                                                                                                                                                                                         | Idiopathic interstitial pneumonia not otherwise specified        |
| 516.31                                                                                                                                                                                                                                                                                                                                                                                                                                                                                                                                                                                                                                                                                                                                                                                                                                                                                                                                                                                                                                                         | Idiopathic pulmonary fibrosis                                    |
| 516.32                                                                                                                                                                                                                                                                                                                                                                                                                                                                                                                                                                                                                                                                                                                                                                                                                                                                                                                                                                                                                                                         | Idiopathic non-specific interstitial pneumonitis                 |
| 516.33                                                                                                                                                                                                                                                                                                                                                                                                                                                                                                                                                                                                                                                                                                                                                                                                                                                                                                                                                                                                                                                         | Acute interstitial pneumonitis                                   |
| 516.34                                                                                                                                                                                                                                                                                                                                                                                                                                                                                                                                                                                                                                                                                                                                                                                                                                                                                                                                                                                                                                                         | Respiratory bronchiolitis interstitial lung disease              |
| 516.35                                                                                                                                                                                                                                                                                                                                                                                                                                                                                                                                                                                                                                                                                                                                                                                                                                                                                                                                                                                                                                                         | Idiopathic lymphoid interstitial pneumonia                       |
| 516.36                                                                                                                                                                                                                                                                                                                                                                                                                                                                                                                                                                                                                                                                                                                                                                                                                                                                                                                                                                                                                                                         | Cryptogenic organizing pneumonia                                 |
| 516.37                                                                                                                                                                                                                                                                                                                                                                                                                                                                                                                                                                                                                                                                                                                                                                                                                                                                                                                                                                                                                                                         | Desquamative interstitial pneumonia                              |
| 516.8x                                                                                                                                                                                                                                                                                                                                                                                                                                                                                                                                                                                                                                                                                                                                                                                                                                                                                                                                                                                                                                                         | Other specified alveolar and parietoalveolar pneumonopathies     |
| 516.9x                                                                                                                                                                                                                                                                                                                                                                                                                                                                                                                                                                                                                                                                                                                                                                                                                                                                                                                                                                                                                                                         | Unspecified alveolar and parietoalveolar pneumonopathy           |

| <b>ICD Codes for Interstitial Lung Disease</b> |                                                                                                |
|------------------------------------------------|------------------------------------------------------------------------------------------------|
| <b>ICD-10</b>                                  | <b>Diagnosis</b>                                                                               |
| J84.1x                                         | Other interstitial pulmonary diseases with fibrosis                                            |
| J84.10                                         | Pulmonary fibrosis, unspecified                                                                |
| J84.11                                         | Idiopathic interstitial pneumonia                                                              |
| J84.111                                        | Idiopathic interstitial pneumonia, not otherwise specified                                     |
| J84.112                                        | Idiopathic pulmonary fibrosis                                                                  |
| J84.113                                        | Idiopathic non-specific interstitial pneumonitis                                               |
| J84.114                                        | Acute interstitial pneumonitis                                                                 |
| J84.115                                        | Respiratory bronchiolitis interstitial lung disease                                            |
| J84.116                                        | Cryptogenic organizing pneumonia                                                               |
| J84.117                                        | Desquamative interstitial pneumonia                                                            |
| J84.17                                         | Other interstitial pulmonary diseases with fibrosis in diseases classified elsewhere           |
| J84.170                                        | Interstitial lung disease with progressive fibrotic phenotype in diseases classified elsewhere |
| J84.178                                        | Other interstitial pulmonary diseases with fibrosis in diseases classified elsewhere           |
| J84.89                                         | Other specified interstitial pulmonary diseases                                                |
| J84.9                                          | Interstitial pulmonary disease, unspecified                                                    |

CPT = current procedural terminology; ICD = international classification of diseases.

| <b>eTable 2. Codes Used in ILD Algorithms</b> |                                          |                           |                                             |
|-----------------------------------------------|------------------------------------------|---------------------------|---------------------------------------------|
| <b>Procedure</b>                              | <b>CPT</b>                               | <b>ICD-9 CM Procedure</b> | <b>ICD-10 PCS</b>                           |
| <b>Lung Biopsy</b>                            |                                          |                           |                                             |
| Surgical                                      | 32095, 32096, 32097, 32602, 32607, 32608 | 33.20, 33.28, 34.21       | 0BB30*X-<br>0BB90*X,<br>0BBB0*X-<br>0BBM0*X |
| Transbronchial                                | 31628, 31629, 31632                      | 33.27                     | 0BB38*X-<br>0BB98*X,<br>0BBB8*X-<br>0BBM8*X |
| Percutaneous                                  | 32405                                    | 33.26                     | 0BB33*X-<br>0BB93*X,<br>0BBB3*X-<br>0BBM3*X |
| <b>Chest computed tomography (CT)</b>         |                                          |                           |                                             |
| Chest CT                                      | 71250, 71260, 71270                      | 87.41                     | BB24***                                     |
| Low dose chest CT                             | G0297                                    |                           |                                             |
| CT-angiogram                                  | 71275                                    |                           |                                             |
| <b>Pulmonary function tests (PFTs)</b>        |                                          |                           |                                             |
| Spirometry                                    | 94010, 94060, 94070, 94150, 94200, 94375 | 89.37, 89.38              | 4A09***                                     |
| Lung volume                                   | 94250, 94726, 94727                      |                           |                                             |
| Diffusion capacity                            | 94729                                    |                           |                                             |

ILD = interstitial lung disease; CPT = current procedural terminology; ICD = international classification of diseases; CM = clinical modification; PCS = procedure coding system. \*denotes any code in this position.

Table adopted from: England BR, Roul P, Mahajan TD, Singh N, Yu F, Sayles H, et al. Performance of Administrative Algorithms to Identify Interstitial Lung Disease in Rheumatoid Arthritis. *Arthritis Care Res (Hoboken)*. 2020 Oct; 72(10):1392-1403.

**eTable 3.** Codes Used to Exclude Other Causes of ILD

| <b>ICD Codes for Other Causes of ILD to Exclude</b> |                                     |
|-----------------------------------------------------|-------------------------------------|
| <b>ICD-9</b>                                        | <b>Diagnosis</b>                    |
| 135.x                                               | Sarcoidosis                         |
| 517.2, 710.1                                        | Systemic sclerosis                  |
| 710.3-710.4                                         | Myositis                            |
| 710.0                                               | Systemic lupus erythematosus        |
| 495.x                                               | Hypersensitivity pneumonitis        |
| 500.x-505.x                                         | Pneumoconioses (including asbestos) |
| 508.1                                               | Radiation pneumonitis               |
| <b>ICD-10</b>                                       | <b>Diagnosis</b>                    |
| D86.x                                               | Sarcoidosis                         |
| M34.x                                               | Systemic sclerosis                  |
| M33.x                                               | Myositis                            |
| M32.x                                               | Systemic lupus erythematosus        |
| J67.x                                               | Hypersensitivity pneumonitis        |
| J60.x-J64.x                                         | Pneumoconioses (including asbestos) |
| J70.0-J70.1                                         | Radiation pneumonitis               |

ICD = international classification of diseases; ILD = interstitial lung disease.

Table adopted from: England BR, Roul P, Mahajan TD, Singh N, Yu F, Sayles H, et al. Performance of Administrative Algorithms to Identify Interstitial Lung Disease in Rheumatoid Arthritis. *Arthritis Care Res (Hoboken)*. 2020 Oct; 72(10):1392-1403.

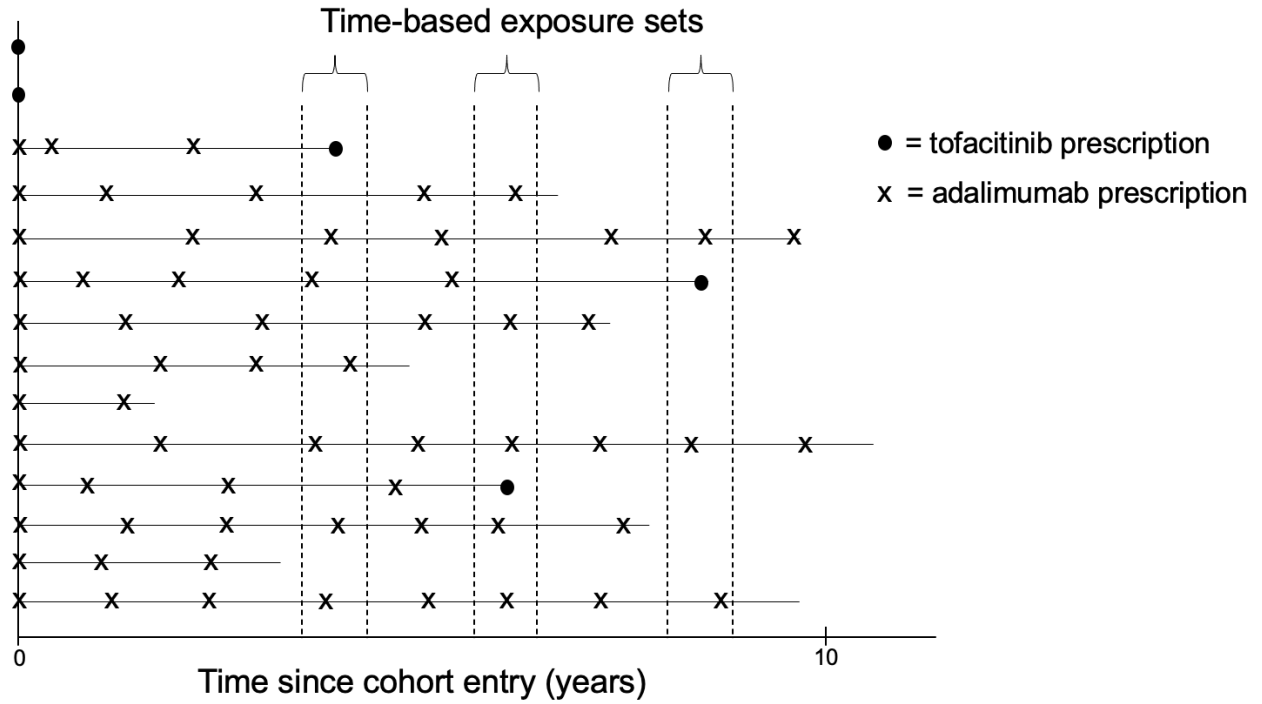

**eFigure 1.** Prevalent New-User Study Design With Time-Based Exposure Sets Defined by a 30-Day Interval Surrounding the Timing of Tofacitinib Initiation

Figure adopted from: Suissa S, Moodie EE, Dell’Aniello S. Prevalent new-user cohort designs for comparative drug effect studies by time-conditional propensity scores. *Pharmacoepidemiol Drug Saf.* 2017 Apr; 26(4):459-468.

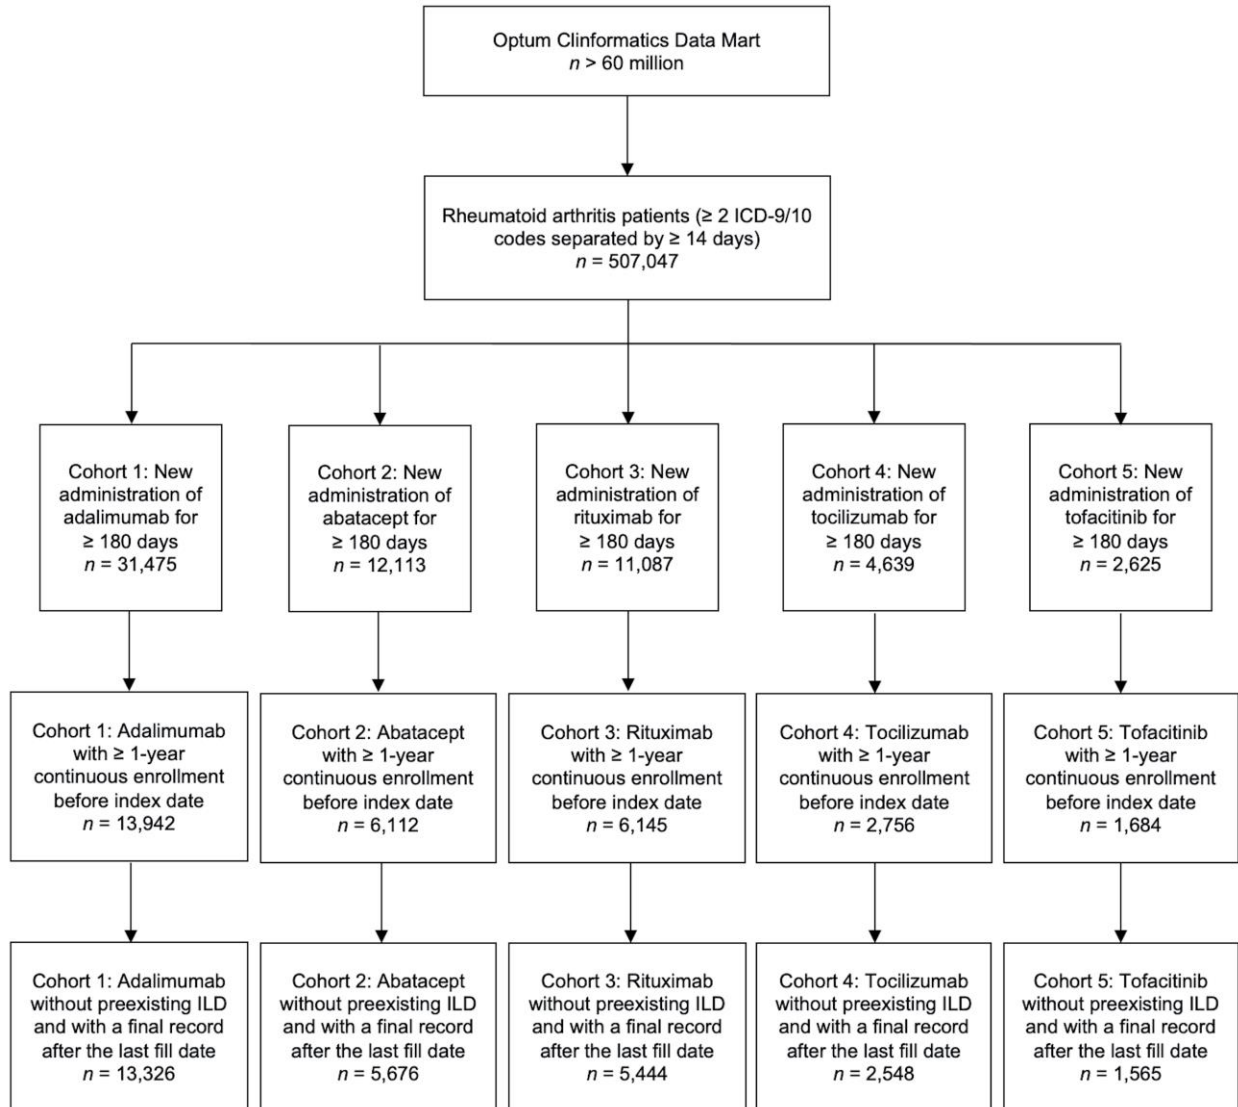

**eFigure 2.** Cohort Selection

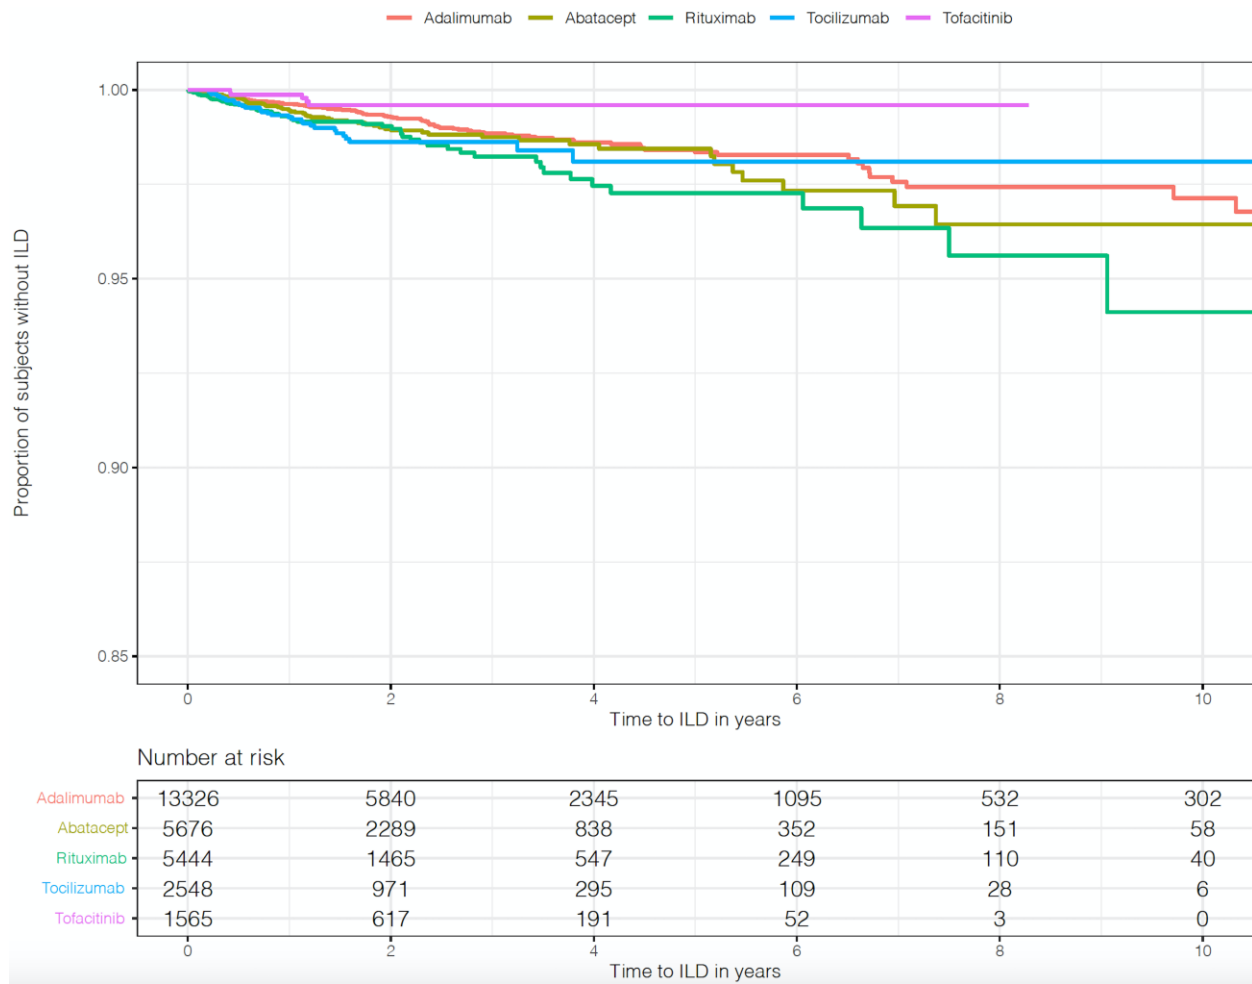

**eFigure 3.** Kaplan–Meier Plot for the Risk of ILD During Treatment With Different b/tsDMARDs in Patients With RA
