# Supplementary material for: Incidence of Interstitial Lung Disease in Patients With Rheumatoid Arthritis Treated With Biologic and Targeted Synthetic Disease-Modifying Antirheumatic Drugs
Source: PubMed Central journal article supplement (PMC10028485; doi:10.1001/jamanetworkopen.2023.3640), 2023-03-20
Supplement: jamanetwopen-e233640-s002.pdf [file jamanetwopen-e233640-s002.pdf]

## Data Sharing Statement

Baker. Incidence of Interstitial Lung Disease in Patients With Rheumatoid Arthritis Treated With Biologic and Targeted Synthetic Disease-Modifying Antirheumatic Drugs. *JAMA Netw Open*. Published March 20, 2023. doi:10.1001/jamanetworkopen.2023.3640

### Data

**Data available:** No
